# Supplementary material for: Facile fabrication of porous BiVO4hollow spheres with improved visible-light photocatalytic properties
Source: Royal Society of Chemistry journal article supplement (doi:10.1039/d0ra00698j), 2020-01-01
Supplement: d0ra00698j1.pdf [file d0ra00698j1.pdf]

## Supporting Information

### Facile fabrication of porous BiVO<sub>4</sub> hollow spheres with improved visible-light photocatalytic properties

Jun Mao<sup>§a</sup>, Qian Wu<sup>§a</sup>, Feifei Tao<sup>\*a,b</sup>, Wen Xu<sup>\*c</sup>, Tianjie Hong<sup>a</sup>, Yali Dong<sup>a</sup>

<sup>a</sup> Department of Chemistry and Chemical Engineering, Shaoxing University, Shaoxing 312000, P.

R. China

<sup>b</sup> Shanghai Advanced Research Institute, Chinese Academy of Sciences, Shanghai 201210, P. R.

China

<sup>c</sup> School of Chemistry and Chemical Engineering, Huangshan University, Huangshan 245041, P.

R. China

Corresponding author: Feifei Tao, Wen Xu

Email: [feifeitao@usx.edu.cn](mailto:feifeitao@usx.edu.cn) (F. Tao), [xuwen1112@163.com](mailto:xuwen1112@163.com) (W. Xu)

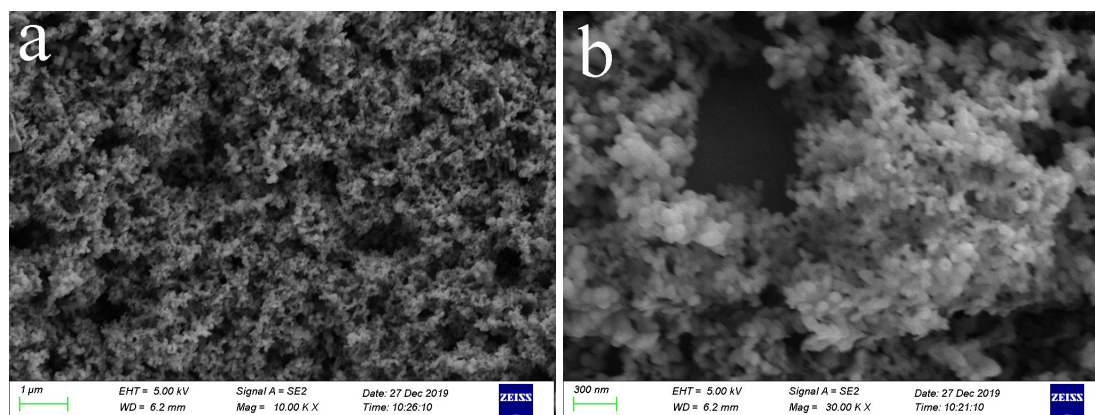

**Fig. S1** SEM images of the as-synthesized product at the reaction time of 2 h.

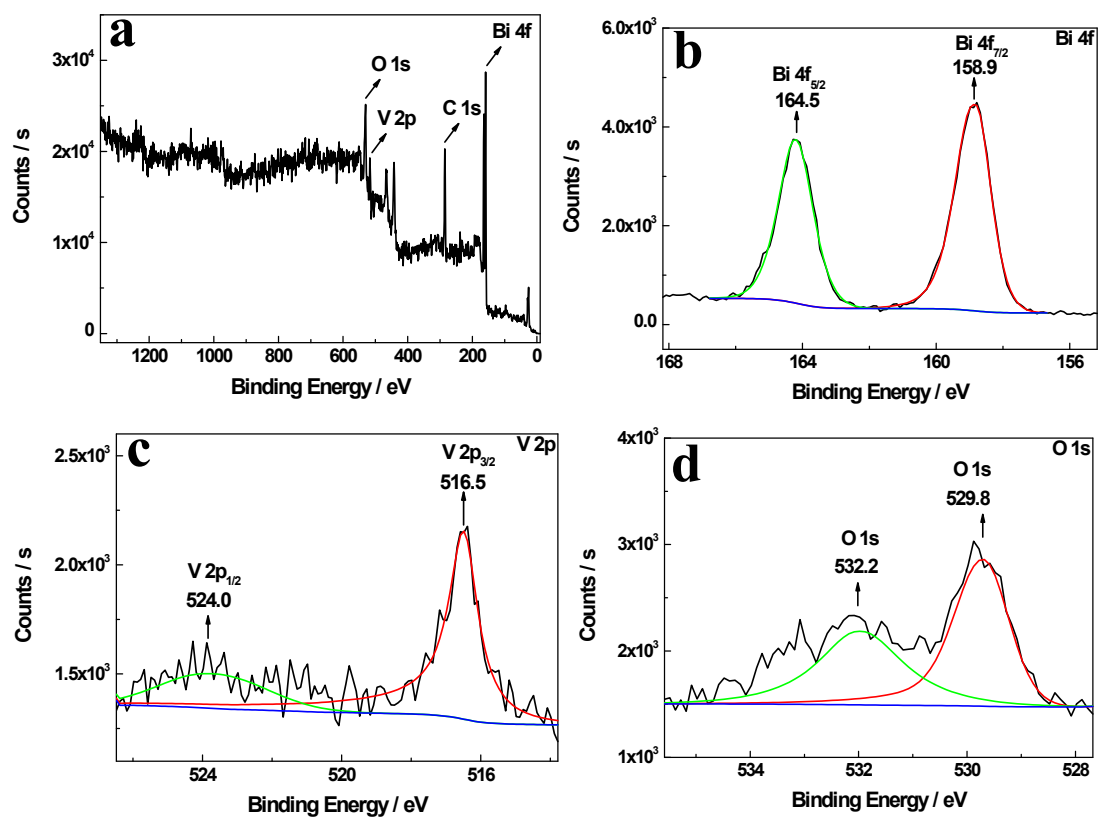

Fig. S2 The wide spectrum (a), Bi 4f (b), V 2p (c) and O 1s (d) XPS spectra of BiVO<sub>4</sub> hollow spheres.

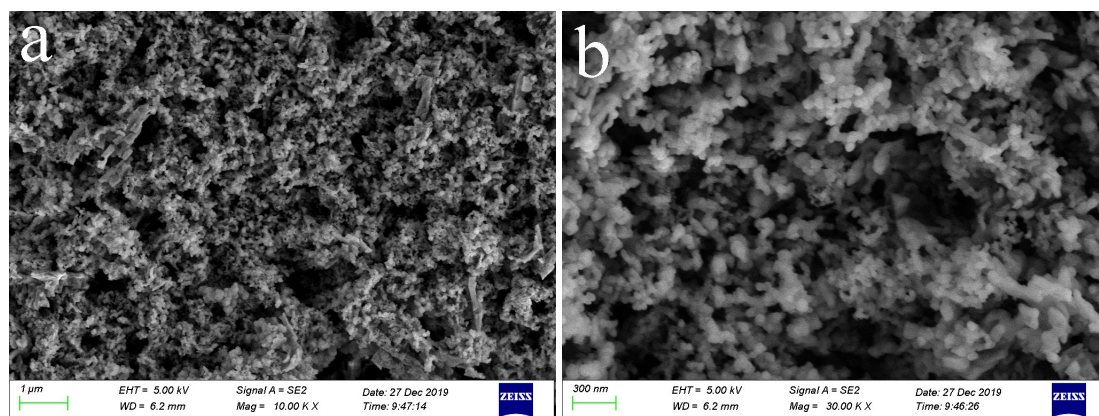

Fig. S3 SEM images of the as-prepared products at the reaction time of 10 min.

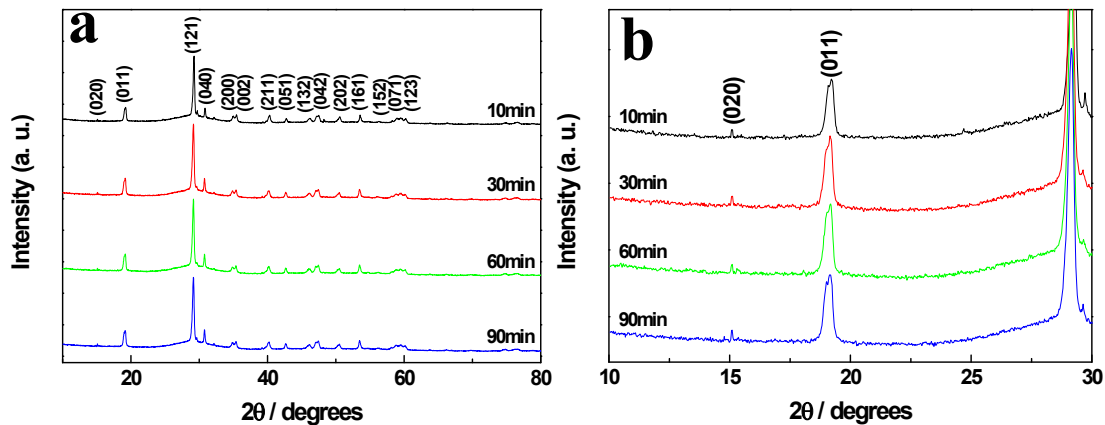

Fig. S4 XRD patterns (a) and a partial enlarged XRD patterns (b) of the as-prepared products at the reaction time of 10 min, 30 min, 60 min and 90 min.

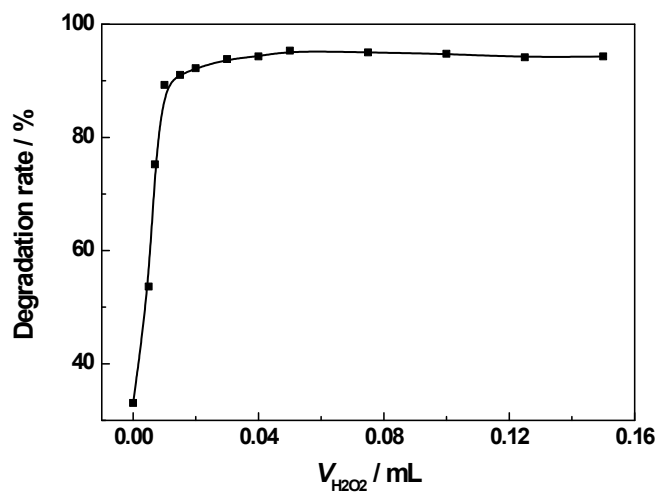

Fig. S5 Effect of H<sub>2</sub>O<sub>2</sub> amount on the photocatalytic degradation rate of MO in the presence of BiVO<sub>4</sub> hollow spheres.

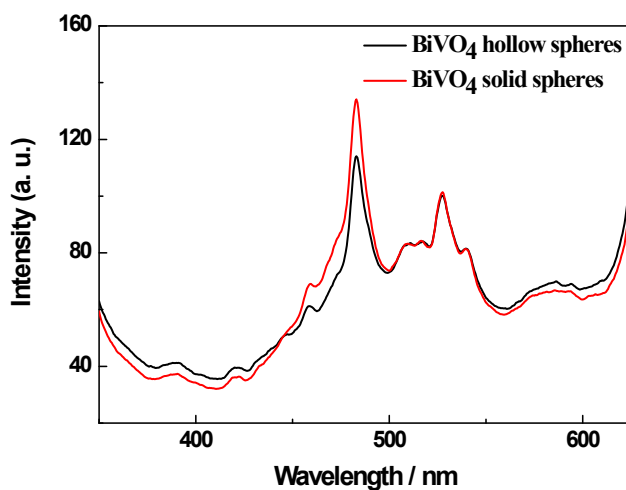

Fig. S6 PL spectra of BiVO<sub>4</sub> hollow spheres and BiVO<sub>4</sub> solid spheres at an excitation wavelength of 325 nm.
